# Supplementary material for: Prenatal Exposure to Organophosphorus Pesticides and Preschool ADHD in the Norwegian Mother, Father and Child Cohort Study
Source: MDPI journal article supplement (doi:10.3390/ijerph19138148), 2022-07-02
Supplement: s1 [file s1]

## Supplementary Material

**Table S1.** Prenatal urinary organophosphorus pesticide metabolite concentration (nM/L) distribution in a nested case–cohort study of preschool attention-deficit hyperactivity disorder in the Norwegian Mother and Child Cohort (MoBa), birth years 2004–2008.

| OP Metabolite | Population | N   | Geometric Mean | Geometric SD | Min  | 25%  | 50%  | 75%  | Max  |
|---------------|------------|-----|----------------|--------------|------|------|------|------|------|
| DEP (nM/L)    | Case       | 259 | 13.5           | 2.31         | 1.15 | 7.71 | 12.9 | 23.4 | 162  |
|               | Subcohort  | 547 | 14.5           | 2.40         | 0.01 | 8.52 | 14.2 | 24.7 | 124  |
| DETP (nM/L)   | Case       | 259 | 3.57           | 4.07         | 0.12 | 1.14 | 3.61 | 9.38 | 184  |
|               | Subcohort  | 547 | 4.33           | 4.14         | 0.01 | 1.63 | 4.18 | 10.5 | 541  |
| ΣDEP (nM/L)   | Case       | 259 | 19.0           | 2.46         | 2.04 | 10.1 | 18.2 | 34.3 | 241  |
|               | Subcohort  | 547 | 21.1           | 2.58         | 0.02 | 11.5 | 19.7 | 37.3 | 581  |
| DMP (nM/L)    | Case       | 259 | 25.0           | 3.66         | 0.98 | 7.31 | 28.4 | 60.6 | 551  |
|               | Subcohort  | 547 | 31.6           | 3.74         | 0.03 | 11.0 | 37.5 | 80.2 | 1057 |
| DMTP (nM/L)   | Case       | 259 | 20.0           | 3.49         | 0.27 | 8.13 | 19.5 | 43.0 | 785  |
|               | Subcohort  | 547 | 26.5           | 3.88         | 0.01 | 10.4 | 22.9 | 60.2 | 1291 |
| DMDTP (nM/L)  | Case       | 259 | 2.86           | 3.34         | 0.19 | 1.33 | 2.41 | 5.05 | 276  |
|               | Subcohort  | 547 | 3.33           | 3.62         | 0.01 | 1.43 | 2.76 | 5.93 | 356  |
| ΣDMP (nM/L)   | Case       | 259 | 56.1           | 3.05         | 3.14 | 25.6 | 56.7 | 114  | 1363 |
|               | Subcohort  | 547 | 72.0           | 3.29         | 0.05 | 31.7 | 66.1 | 156  | 1979 |

Note: DEP, diethylphosphate; DETP, diethylthiophosphate; ΣDEP, sum of diethylphosphates; DMP, dimethylphosphate; DMTP, dimethylthiophosphate; DMDTP, dimethyldithiophosphate; ΣDMP, sum of dimethylphosphates. Values for concentrations below the LOQ were imputed. Values standardized to the geometric mean of specific gravity.

**Table S2.** Associations, based on alternative adjustment sets, between prenatal urinary organophosphorus pesticide metabolite concentrations and child's preschool ADHD in a nested case–cohort study of the Norwegian Mother, Father and Child Cohort (MoBa), birth years 2004–2008.

| OP Metabolite     | Case | Sub-Cohort | Log <sub>10</sub> OR (95% CI) | Case | Sub-Cohort | Q1 (ref) OR (95% CI) | Case | Sub-Cohort | Q2 OR (95% CI)    | Case | Sub-Cohort | Q3 OR (95% CI)    | Case | Sub-Cohort | Q4 OR (95% CI)    |
|-------------------|------|------------|-------------------------------|------|------------|----------------------|------|------------|-------------------|------|------------|-------------------|------|------------|-------------------|
| ΣDEP <sup>0</sup> | 259  | 547        | 0.76 (0.52, 1.09)             | 72   | 129        | ref                  | 62   | 140        | 0.79 (0.52, 1.20) | 67   | 135        | 0.89 (0.59, 1.34) | 58   | 143        | 0.73 (0.48, 1.11) |
| ΣDEP <sup>1</sup> | 231  | 483        | 1.08 (0.67, 1.75)             | 66   | 117        | ref                  | 56   | 124        | 0.96 (0.59, 1.56) | 58   | 115        | 1.13 (0.69, 1.85) | 51   | 127        | 0.94 (0.55, 1.61) |
| ΣDEP <sup>2</sup> | 258  | 538        | 1.07 (0.69, 1.67)             | 71   | 129        | ref                  | 62   | 139        | 0.91 (0.59, 1.42) | 67   | 131        | 1.13 (0.72, 1.78) | 58   | 139        | 0.97 (0.60, 1.58) |

|                           |     |     |                      |    |     |     |    |     |                      |    |     |                      |    |     |                      |
|---------------------------|-----|-----|----------------------|----|-----|-----|----|-----|----------------------|----|-----|----------------------|----|-----|----------------------|
| $\Sigma$ DEP <sup>3</sup> | 250 | 526 | 1.09<br>(0.69, 1.72) | 69 | 125 | ref | 62 | 137 | 0.93<br>(0.59, 1.46) | 64 | 127 | 1.10<br>(0.69, 1.74) | 55 | 137 | 0.94<br>(0.57, 1.54) |
| $\Sigma$ DEP <sup>4</sup> | 256 | 526 | 1.08<br>(0.69, 1.69) | 71 | 127 | ref | 62 | 137 | 0.81<br>(0.52, 1.25) | 66 | 127 | 0.85<br>(0.54, 1.34) | 57 | 135 | 0.66<br>(0.40, 1.08) |
| $\Sigma$ DEP <sup>5</sup> | 244 | 503 | 1.10<br>(0.69, 1.75) | 69 | 120 | ref | 60 | 131 | 0.95<br>(0.60, 1.52) | 61 | 122 | 1.10<br>(0.68, 1.76) | 54 | 130 | 0.96<br>(0.58, 1.60) |
| $\Sigma$ DMP <sup>0</sup> | 259 | 547 | 0.65<br>(0.49, 0.88) | 77 | 124 | ref | 63 | 139 | 0.73<br>(0.48, 1.10) | 67 | 135 | 0.80<br>(0.53, 1.20) | 52 | 149 | 0.56<br>(0.37, 0.86) |
| $\Sigma$ DMP <sup>1</sup> | 231 | 483 | 0.79<br>(0.53, 1.17) | 73 | 111 | ref | 52 | 127 | 0.75<br>(0.47, 1.19) | 59 | 119 | 0.88<br>(0.54, 1.42) | 47 | 126 | 0.75<br>(0.44, 1.26) |
| $\Sigma$ DMP <sup>2</sup> | 258 | 538 | 0.72<br>(0.51, 1.04) | 77 | 123 | ref | 62 | 138 | 0.80<br>(0.52, 1.23) | 67 | 133 | 0.87<br>(0.56, 1.35) | 52 | 144 | 0.66<br>(0.41, 1.08) |
| $\Sigma$ DMP <sup>3</sup> | 250 | 526 | 0.71<br>(0.49, 1.02) | 76 | 120 | ref | 59 | 133 | 0.81<br>(0.52, 1.25) | 65 | 131 | 0.85<br>(0.54, 1.34) | 50 | 142 | 0.66<br>(0.40, 1.08) |
| $\Sigma$ DMP <sup>4</sup> | 256 | 526 | 0.75<br>(0.52, 1.08) | 77 | 122 | ref | 61 | 136 | 0.92<br>(0.59, 1.45) | 67 | 129 | 1.14<br>(0.72, 1.81) | 51 | 139 | 0.96<br>(0.59, 1.57) |
| $\Sigma$ DMP <sup>5</sup> | 244 | 503 | 0.77<br>(0.53, 1.11) | 76 | 116 | ref | 56 | 130 | 0.79<br>(0.50, 1.23) | 63 | 126 | 0.87<br>(0.55, 1.39) | 49 | 131 | 0.73<br>(0.44, 1.22) |

Note: Log<sub>10</sub>OR, OR per log<sub>10</sub>-unit increase in concentration; ref, reference; Q1, quartile 1; Q2, quartile 2; Q3, quartile 3; Q4, quartile 4; CI, confidence interval;  $\Sigma$  DEP, sum of diethylphosphates metabolites;  $\Sigma$  DMP, sum of dimethylphosphates metabolites; OR, odds ratio. model 0, unadjusted; model 1 adjusted for maternal education, parity, maternal income dependency, maternal age, marital status, maternal ADHD-like symptoms, pesticide use, fruit consumption, raw vegetable consumption, and season; model 2 adjusted for maternal age, maternal education level, parity; model 3 adjusted for maternal income dependency, maternal education, and parity; model 4 adjusted for maternal age, maternal education, maternal ADHD-like symptoms, and parity; model 5 adjusted for maternal education, parity, maternal income dependency, maternal age, maternal ADHD-like symptoms, fruit consumption, and raw vegetable consumption; all models adjusted for specific gravity through standardization; All adjusted models were mutually adjusted for complementary DAP metabolite group.
